# Supplementary material
Source: publisher figshare collection journal article supplement (https://gsajournals.figshare.com/ndownloader/files/23841959)
Supplement: Supplementary file 1 [file 23841959]

Table S1

Reagents List

| Strain | Genotype | Plasmid | Related Figures |
| --- | --- | --- | --- |
| NYL1117 | *Pf16f9.3::GFP(yadIs46) II* | PNYL1228 | Fig. 1 and WT control for other figures |
| NYL2275 | *Pf16f9.3::GFP(yadIs46) II; ngn-1(ok2200) IV* |  | Fig. 1B, C, E; Fig. 3E |
| NYL2276 | *Pf16f9.3::GFP(yadIs46) II; cnd-1(gk718) III* |  | Fig. 1C, E; Fig. 3E |
| NYL1676 | *Pf16f9.3::GFP(yadIs46) II; ngn-1(ok2200) IV; cnd-1(gk718) III* |  | Fig. 1C; Fig. 3E |
| NYL1271 | *Pf16f9.3::GFP(yadIs46) II; Pf16f9.3::mCherry::H2B Pttx-3::RFP(yadEx612)* | PNYL1142 | Fig. 1D, 2B, 2E; Fig. 3F; Fig. S2G |
| NYL2655 | *Pf16f9.3::GFP(yadIs46) II; ngn-1(ok2200) IV; Pf16f9.3::mCherry::H2B Pttx-3::RFP(yadEx1126)* | PNYL1142 | Fig. 1D; Fig. 3F |
| NYL2660 | *Pf16f9.3::GFP(yadIs46) II; cnd-1(gk718) III ; Pf16f9.3::mCherry::H2B Pttx-3::RFP(yadEx1126)* |  | Fig. 1D; Fig. 3F |
| NYL2168 | *Pf16f9.3::GFP(yadIs46) II; ngn-1(ok2200) IV; cnd-1(gk718) III ; Pf16f9.3::mCherry::H2B Pttx-3::RFP(yadEx1126)* |  | Fig. 1D; Fig. 3F |
| NYL2985 | *Pf16f9.3::GFP(yadIs46) II; ngn-1(ok2200) IV; Pngn-1::ngn-1 Pttx-3::RFP(yadEx1495)* | PNYL1400 | Fig. 1E |
| NYL2986 | *Pf16f9.3::GFP(yadIs46) II; cnd-1(gk718) III; Pcnd-1::cnd-1 Pttx-3::RFP(yadEx1496)* | PNYL1401 | Fig. 1E |
| NYL3059 | *Pf16f9.3::GFP(yadIs46) II; lin-32(tm2044) X; Pf16f9.3::mCherry::H2B Pttx-3::RFP(yadEx1545)* | PNYL1142 | Fig. 2B; Fig. S2A, G |
| NYL1249 | *Pf16f9.3::GFP(yadIs46) II; lin-32(yad67) X* |  | Fig. 2C, D; Fig. 3A, B, C |
| NYL1307 | *Pf16f9.3::GFP(yadIs46) II; lin-32(yad67) X; Plin-32::lin-32 Pttx-3::RFP(yadEx633)* | PNYL1229 | Fig. 2C; Fig. 3A |
| NYL2653 | *Pf16f9.3::GFP(yadIs46) II; lin-32(yad67) X; Plin-32::Atoh1 Pttx-3::RFP(yadEx1354)* | PNYL1230 | Fig. 2C; Fig. 3A |
| NYL2642 | *Pf16f9.3::GFP(yadIs46) II; lin-32(tm2044) X* |  | Fig. 2D; Fig. 3E |
| NYL2646 | *Pf16f9.3::GFP(yadIs46) II; lin-32(tm1446) X* |  | Fig. 2D |
| NYL2650 | *Pf16f9.3::GFP(yadIs46) II; lin-32(u282) X* |  | Fig. 2D |
| NYL1252 | *Pf16f9.3::GFP(yadIs46) II; lin-32(yad67) X; Pf16f9.3::mCherry::H2B Pttx-3::RFP(yadEx612)* |  | Fig. 2E; Fig. 3F; Fig. S2A, G |
| NYL1234 | *Pgrl-2(S)::YFP Pgrl-2(S)::H2B::mCherry Pttx-3::GFP(yadIs47)* | PNYL1231  PNYL1232 | Fig. 2F, G |
| NYL1363 | *Pgrl-2(S)::YFP Pgrl-2(S)::H2B::mCherry Pttx-3::GFP(yadIs47); lin-32(yad67) X* |  | Fig. 2F, G |
| NYL1324 | *Pf16f9.3::GFP(yadIs46) II; lin-32(yad67) X; Pf16f9.3::lin-32 Pttx-3::RFP(yadEx645)* | PNYL1233 | Fig. 3A |
| NYL1547 | *Pf16f9.3::GFP(yadIs46) II; lin-32(yad67) X; Plin-26::lin-32 Pttx-3::RFP(yadEx790)* | PNYL1234 | Fig. 3A |
| NYL1550 | *Pf16f9.3::GFP(yadIs46) II; lin-32(yad67) X; Pdyf-7::lin-32 Pttx-3::RFP(yadEx793)* | PNYL1235 | Fig. 3A |
| NYL2644 | *Pf16f9.3::GFP(yadIs46) II; lin-32(yad67) X; Pgrl-2(S)::lin-32 Pttx-3::RFP(yadEx1355)* | PNYL1236 | Fig. 3A |
| NYL2656 | *Pf16f9.3::GFP(yadIs46) II; lin-32(yad67) X; Pflp-3::lin-32 Pttx-3::RFP(yadEx1354)* | PNYL1237 | Fig. 3A |
| NYL1534 | *Pf16f9.3::GFP(yadIs46) II; lin-32(yad67) X; Pdpy-7::lin-32 Pttx-3::RFP(yadEx777)* | PNYL1238 | Fig. 3A |
| NYL2648 | *Pf16f9.3::GFP(yadIs46) II; lin-32(yad67) X; Pmyo-2::lin-32 Pttx-3::RFP(yadEx1353)* | PNYL1239 | Fig. 3A |
| NYL2343 | *Plin-32::lin-32::GFP unc-119(+)(ezIs10) II; unc-119(ed3) III; him-8(e1489) IV; Pf16f9.3::mCherry::H2B Pttx-3::RFP(yadEx1191)* | PNYL1142 | Fig. 3D; Fig. S2B |
| NYL2652 | *Pf16f9.3::GFP(yadIs46) II; lin-32(tm2044) X; ngn-1(ok2200) IV* |  | Fig. 3E |
| NYL1575 | *Pf16f9.3::GFP(yadIs46) II; lin-32(tm2044) X; cnd-1(gk718) III* |  | Fig. 3E |
| NYL1606 | *Pf16f9.3::GFP(yadIs46) II; lin-32(tm2044) X; ngn-1(ok2200) IV; cnd-1(gk718) III* |  | Fig. 3E |
| NYL2169 | *Pf16f9.3::GFP(yadIs46) II; lin-32(tm2044) X; cnd-1(gk718) III ; Pf16f9.3::mCherry::H2B Pttx-3::RFP(yadEx1044)* | PNYL1142 | Fig. 3F |
| NYL2657 | *Pf16f9.3::GFP(yadIs46) II; lin-32(tm2044) X; ngn-1(ok2200) IV; Pf16f9.3::mCherry::H2B Pttx-3::RFP(yadEx1044)* |  | Fig. 3F |
| NYL2059 | *Pf16f9.3::GFP(yadIs46) II; lin-32(tm2044) X; ngn-1(ok2200) IV; cnd-1(gk718) III; Pf16f9.3::mCherry::H2B Pttx-3::RFP(yadEx1044)* |  | Fig. 3F |
| NYL1159 | *Pf16f9.3::GFP(yadIs46) II; dyf-7(yad53) X* |  | Fig. 4A, B |
| NYL1195 | *Pf16f9.3::GFP(yadIs46) II; dyf-7(yad53) X; lin-32(yad67) X* |  | Fig. 4A, B |
| NYL2987 | *Phlh-17::GFP(yadEx1497)* | PNYL1402 | Fig. 4C |
| NYL2988 | *lin-32(tm2044) X; Phlh-17::GFP(yadEx1497)* |  | Fig. 4C |
| NYL2989 | *lin-32(tm2044) X; Phlh-17::GFP Pf16f9.3::mCherry(yadEx1498)* | PNYL1402  PNYL1403 | Fig. 4D, E |
| NYL2990 | *Pf16f9.3::mCherry::H2B Pf53f4.13::GFP (yadEx1499)* | PNYL1142  PNYL1124 | Fig. S1B, C |
| NYL2991 | *Pf16f9.3::mCherry::H2B Pt02b11.3::GFP (yadEx1500)* | PNYL1142  PNYL1404 | Fig. S1D |
| NYL2647 | *Pf16f9.3::GFP(yadIs46) II; hlh-2(tm1768) I* |  | Fig. S1E |
| NYL2643 | *Pf16f9.3::GFP(yadIs46) II; ham-1(n1438) IV* |  | Fig. S1E |
| NYL2645 | *Pf16f9.3::GFP(yadIs46) II; ham-1(tm4595) IV* |  | Fig. S1E |
| NYL1368 | *Pf16f9.3::GFP(yadIs46) II; lin-12(n941)X/eT1 III; him-5(e1467)/eT1 [him-5(e1467)] V* |  | Fig. S1E |
| NYL1435 | *Pf16f9.3::GFP(yadEx700); lin-12(n302) III* | PNYL1228 | Fig. S1E |
| NYL2651 | *Pf16f9.3::GFP(yadIs46) II; hlh-16(ot711) I* |  | Fig. S1E |
| NYL1599 | *Pf16f9.3::GFP(yadIs46) II; vab-15(u781) X* |  | Fig. S1E |
| DZ390 | *Plin-32::lin-32::GFP unc-119(+)(ezIs10) II; unc-119(ed3) III; him-8(e1489) IV* |  | Fig. S2C |
| NYL2659 | *Plin-32::lin-32::GFP unc-119(+)(ezIs10) II; unc-119(ed3) III; him-8(e1489) IV; cnd-1(gk718) III* |  | Fig. S2C |
| NYL2328 | *Plin-32::lin-32::GFP unc-119(+)(ezIs10) II; unc-119(ed3) III; him-8(e1489) IV; ngn-1(ok2200) IV* |  | Fig. S2C |
| MT19703 | *Pngn-1::ngn-1::GFP lin-15(+)(nIs394) III; lin-15AB(n765) X* |  | Fig. S2D |
| NYL2331 | *Pngn-1::ngn-1::GFP lin-15(+)(nIs394) III; lin-15AB(n765) X; cnd-1(gk718) III* |  | Fig. S2D |
| NYL2329 | *Pngn-1::ngn-1::GFP lin-15(+)(nIs394) III; lin-15AB(n765) X; lin-32(tm2044) X* |  | Fig. S2D |
| NYL1321 | *Pf16f9.3::GFP Pflp-3::mCherry(yadIs56)* | PNYL1228  PNYL1240 | Fig. S2E |
| NYL1322 | *Pf16f9.3::GFP Pflp-3::mCherry(yadIs56); lin-32(yad67) X* |  | Fig. S2E |
| NYL1362 | *Pf16f9.3::GFP Pflp-3::mCherry(yadIs56); unc-86(e1416) III* |  | Fig. S2F |
| NYL2991 | *Plin-32::ced-3 Pttx-3::RFP(yadEx1501)* | PNYL1405 | Fig. S2G |
| NYL2992 | *Plin-32::ced-3 Pttx-3::RFP(yadEx1502)* | PNYL1405 | Fig. S2G |
| NYL2993 | *lin-32(yad67);Plin-32::ced-3 Pttx-3::RFP(yadEx1503)* | PNYL1405 | Fig. S2G |
| NYL2994 | *lin-32(yad67);Plin-32::ced-3 Pttx-3::RFP(yadEx1504)* | PNYL1405 | Fig. S2G |
